# Supplementary material for: High Potential Decolourisation of Textile Dyes from Wastewater by Manganese Peroxidase Production of Newly Immobilised Trametes hirsuta PW17-41 and FTIR Analysis
Source: MDPI journal article supplement (doi:10.3390/microorganisms10050992), 2022-05-09
Supplement: s1 [file s1]

**Table S1.** Lists of white-rot fungi used to screen the decolourisation of textile dyes in the present study.

| Taxa                            | Isolation ID | Location                         | GenBank Accession number of ITS* |
|---------------------------------|--------------|----------------------------------|----------------------------------|
| <i>Amauroderma subresinosum</i> | NP17-12      | Nakhon Phanom province, Thailand | OM996018                         |
| <i>Corioloopsis aspera</i>      | NP17-02      | Nakhon Phanom province, Thailand | MK589268                         |
| <i>C. aspera</i>                | NP17-08      | Nakhon Phanom province, Thailand | MK589269                         |
| <i>C. retropicta</i>            | PW17-134     | Chaiyaphum province, Thailand    | MK589270                         |
| <i>Dentipellis parmastoi</i>    | PW17-136     | Chaiyaphum province, Thailand    | MK589290                         |
| <i>Ganoderma fornicatum</i>     | PW17-145     | Chaiyaphum province, Thailand    | MK589271                         |
| <i>G. lingzhi</i>               | PW17-43      | Chaiyaphum province, Thailand    | MK589272                         |
| <i>G. mastoporum</i>            | PW17-06      | Chaiyaphum province, Thailand    | MK589273                         |
| <i>G. mastoporum</i>            | PW17-154     | Chaiyaphum province, Thailand    | MK589275                         |
| <i>Microporus vernicipes</i>    | PW17-173     | Chaiyaphum province, Thailand    | MK589280                         |
| <i>M. xanthopus</i>             | PP17-17      | Sakhon Nakhon province, Thailand | MK589281                         |
| <i>M. xanthopus</i>             | PP17-20      | Sakhon Nakhon province, Thailand | MK589282                         |
| <i>Pseudolagarobasidium</i> sp. | PP17-33      | Sakhon Nakhon province, Thailand | MK589289                         |
| <i>Trametes elegans</i>         | PP17-06      | Sakhon Nakhon province, Thailand | MK589285                         |
| <i>T. hirsuta</i>               | PP17-41      | Sakhon Nakhon province, Thailand | MK589286                         |
| <i>T. sanguinea</i>             | PP17-18      | Sakhon Nakhon province, Thailand | MK589287                         |

\* ITS = Internal Transcribed Spacers

**Table S2.** Screening of textile dye decolourisation using white-rot fungi under submerged condition.

| Taxa                            | Isolation ID | % Dye decolourisation* |
|---------------------------------|--------------|------------------------|
| <i>Amauroderma subresinosum</i> | NP17-12      | 43.52±1.57cde          |
| <i>Coriolopsis aspera</i>       | NP17-02      | 45.12±2.09cd           |
| <i>C. aspera</i>                | NP17-08      | 35.93±6.83ef           |
| <i>C. retropicta</i>            | PW17-134     | 45.51±5.27c            |
| <i>Dentipellis parmastoi</i>    | PW17-136     | 28.26±1.50f            |
| <i>Ganoderma fornicatum</i>     | PW17-145     | 48.24±2.52c            |
| <i>G. lingzhi</i>               | PW17-43      | 50.73±1.25c            |
| <i>G. mastoporum</i>            | PW17-06      | 42.33±0.55cde          |
| <i>G. mastoporum</i>            | PW17-154     | 49.12±1.03c            |
| <i>Microporus vernicipes</i>    | PW17-173     | 28.81±3.09f            |
| <i>M. xanthopus</i>             | PP17-17      | 36.14±0.82def          |
| <i>M. xanthopus</i>             | PP17-20      | 29.31±2.69f            |
| <i>Pseudolagarobasidium</i> sp. | PP17-33      | 70.88±2.59a            |
| <i>Trametes elegans</i>         | PP17-06      | 44.58±4.56cde          |
| <i>T. hirsuta</i>               | PP17-41      | 73.98±0.74a            |
| <i>T. sanguinea</i>             | PP17-18      | 60.18±2.86b            |

\* values of mean ± standard deviation from triplicate. Letters a-f indicate statistically significant differences between groups according to one-way ANOVA ( $n = 3, p < 0.05$ )

**Table S3.** Fungal biomass of immobilised *Trametes hirsuta* PW17-41 on different supports.

| Support          | Fungal biomass of <i>T. hirsuta</i> PW17-41 (g) <sup>1</sup> |
|------------------|--------------------------------------------------------------|
| nylon sponge     | 0.375±0.013a                                                 |
| loofah           | 0.255±0.021b                                                 |
| casara coffee    | 0.001±0.000d                                                 |
| parchment coffee | 0.099±0.007c                                                 |

<sup>1</sup>Values are the mean of three replications ± standard deviation. Different letters indicate statistically significant differences between supporters analysed by one-way ANOVA ( $n = 3, p < 0.05$ ).

**Table S4A.** Effect of carbon source on decolourisation of textile dyes by immobilisation of *T. hirsuta* PW17-41 at 4% (v/v) concentration after 48 h.

| Carbon         | % Dye decolourisation* |
|----------------|------------------------|
| Fructose       | 72.34±0.56d            |
| Lactose        | 76.16±0.36c            |
| Galactose      | 77.31±1.22bc           |
| Glucose        | 78.19±0.31ab           |
| Palm sugar     | 79.47±0.25a            |
| Soluble starch | 79.28±0.36ab           |
| Sucrose        | 78.61±0.16ab           |
| Control        | 64.98±0.47e            |

\* values of mean ± standard deviation from triplicate. Letters a-e indicate statistically significant differences between groups according to one-way ANOVA ( $n = 3$ ,  $p < 0.05$ )

**Table S4B.** Effect of nitrogen source on decolourisation of textile dyes by immobilisation of *T. hirsuta* PW17-41 at 4% (v/v) concentration after 48 h.

| Nitrogen          | % Dye decolourisation* |
|-------------------|------------------------|
| Peptone           | 77.37±0.98bc           |
| Yeast extract     | 72.54±0.18c            |
| Sodium nitrate    | 61.33±0.31d            |
| Ammonium nitrate  | 87.81±4.58a            |
| Ammonium sulphate | 82.05±4.03b            |
| Urea              | 60.30±0.21d            |
| Control           | 63.80±0.58d            |

\* values of mean ± standard deviation from triplicate. Letters a-d indicate statistically significant differences between groups according to one-way ANOVA ( $n = 3$ ,  $p < 0.05$ )

**Table S4C.** Effect of pH on decolourisation of textile dyes by immobilisation of *T. hirsuta* PW17-41 at 4% (v/v) concentration after 48 h.

| pH | % Dye decolourisation* |
|----|------------------------|
| 4  | 84.57±0.21a            |
| 5  | 84.40±0.43a            |
| 6  | 83.42±0.79b            |
| 7  | 59.79±0.60c            |
| 8  | 11.72±0.29d            |
| 9  | 7.60±0.12e             |
| 10 | 6.58±0.41f             |

\* values of mean ± standard deviation from triplicate. Letters a-f indicate statistically significant differences between groups according to one-way ANOVA ( $n = 3$ ,  $p < 0.05$ )

**Table S4D.** Effect of agitation speed on decolourisation of textile dyes by immobilisation of *T. hirsuta* PW17-41 at 4% (v/v) concentration after 48 h.

| Agitation speed (rpm) | % Dye decolourisation* |
|-----------------------|------------------------|
| 0                     | 45.01±2.79d            |
| 50                    | 68.80±1.98c            |
| 100                   | 94.60±0.31a            |
| 150                   | 83.18±1.43b            |

\* values of mean ± standard deviation from triplicate. Letters a-c indicate statistically significant differences between groups according to one-way ANOVA ( $n = 3, p < 0.05$ )

**Table S5.** Effects of the initial textile dye concentrations on the textile dye decolourisation by immobilised *T. hirsuta* PW17-41.

| Dye concentration % (v/v) | Initial ADMI values | % Dye decolourisation* |
|---------------------------|---------------------|------------------------|
| 4                         | 2,450               | 96.54±0.10a            |
| 8                         | 6,100               | 96.53±0.05a            |
| 17                        | 11,150              | 96.51±0.05a            |
| 25                        | 15,350              | 96.46±0.07ab           |
| 33                        | 21,200              | 96.43±0.12ab           |
| 42                        | 26,900              | 96.20±0.06ab           |
| 50                        | 31,700              | 96.07±0.09b            |
| 66                        | 40,800              | 94.38±0.26c            |
| 83                        | 47,700              | 92.95±0.30d            |
| 100                       | 60,100              | 89.17±0.09e            |

\* values of mean ± standard deviation from triplicate. Letters a-e indicate statistically significant differences between groups according to one-way ANOVA ( $n = 3$ ,  $p < 0.05$ )

**Table S6.** Adsorption of dead and living biomass of immobilised *T. hirsuta* PW17-41 for textile dye decolourisation.

| Materials                                                      | % Dye decolourisation |
|----------------------------------------------------------------|-----------------------|
| Nylon sponge                                                   | 3.06±0.54e            |
| Mycelium                                                       | 20.48±0.99d           |
| Dead biomass of immobilised mycelia (adsorption)               | 28.26±0.37c           |
| Living biomass of immobilised mycelia (degradation)            | 60.23±0.25b           |
| Living biomass of immobilised mycelia (adsorption+degradation) | 89.10±0.23a           |

\* values of mean ± standard deviation from triplicate. Letters a-e indicate statistically significant differences between groups according to one-way ANOVA ( $n = 3$ ,  $p < 0.05$ )

**Table S7.** Time course study of textile dye decolourisation and MnP and laccase production by immobilised *T. hirsuta* PW17-41 under submerged cultivation condition using 33% (v/v) dye concentration (or 21,200 ADMI) at 30°C, 100 rpm for 20 day.

| Day | ADMI value | % Dye decolourisation* | MnP (U/L)*        | Laccase (U/L)*   | Biomass (mg)* | pH*         |
|-----|------------|------------------------|-------------------|------------------|---------------|-------------|
| 0   | 21,200     | 0.00±0.00f             | 0.00±0.00f        | 0.00±0.00f       | 199.63±7.42a  | 5.00±0.00a  |
| 2   | 7,653      | 63.90±1.98e            | 141.04±16.79f     | 63.75±6.56f      | 201.43±0.59a  | 3.37±0.03b  |
| 4   | 3,142      | 85.18±0.51d            | 288.18±42.26f     | 67.38±2.23f      | 210.07±6.85a  | 3.19±0.04c  |
| 6   | 2,032      | 90.42±0.16c            | 1,026.89±21.30e   | 481.48±7.61e     | 211.80±15.55a | 3.19±0.01c  |
| 8   | 866        | 95.91±0.22b            | 2,328.89±306.23d  | 876.67±101.30d   | 203.00±16.40a | 3.16±0.01c  |
| 10  | 493        | 97.67±0.10ab           | 2,759.56±191.84cd | 1,433.33±164.08c | 204.20±15.36a | 3.09±0.02c  |
| 12  | 444        | 97.91±0.03a            | 3,481.78±283.23b  | 1,806.42±110.85b | 204.87±1.97a  | 2.81±0.1d   |
| 14  | 398        | 98.12±0.20a            | 3,645.33±323.93b  | 1,902.72±24.81b  | 205.10±14.20a | 2.73±0.04de |
| 16  | 313        | 98.52±0.01a            | 4,942.22±285.65a  | 2,389.14±102.59a | 206.67±12.96a | 2.63±0.1de  |
| 18  | 305        | 98.56±0.01a            | 4,472.89±331.82a  | 2,062.96±139.91b | 200.73±10.31a | 2.63±0.1e   |
| 20  | 300        | 98.59±0.01a            | 3,082.22±74.00bc  | 1,353.09±131.63c | 209.07±10.31a | 2.59±0.06e  |

\* values of mean ± standard deviation from triplicate. Letters a-f indicate statistically significant differences between groups according to one-way ANOVA ( $n = 3$ ,  $p < 0.05$ )

**Table S8.** Purification of MnP from *Trametes hirsuta* PW17-41

| Purification                                                  | Volume (mL) | Protein content (mg mL <sup>-1</sup> ) | Enzyme activity (U mL <sup>-1</sup> ) | Total protein (mg) | Total enzyme activity (U) | Specific activity (U mg <sup>-1</sup> ) | Purification fold | Yield (%) |
|---------------------------------------------------------------|-------------|----------------------------------------|---------------------------------------|--------------------|---------------------------|-----------------------------------------|-------------------|-----------|
| Crude extract                                                 | 600         | 0.009                                  | 0.715                                 | 5.149              | 429.000                   | 83.314                                  | 1                 | 100       |
| (NH <sub>4</sub> ) <sub>2</sub> SO <sub>4</sub> precipitation | 30          | 0.034                                  | 13.360                                | 1.023              | 400.800                   | 391.96                                  | 4.705             | 93.427    |
| Dialysis                                                      | 22          | 0.040                                  | 16.367                                | 0.891              | 360.067                   | 404.247                                 | 4.852             | 83.932    |

**Table S9.** Repeated batch experiment of textile dye decolourisation for 12 cycles by immobilised *T. hirsuta* PW17-41 under optimal conditions.

| Cycle | % Dye colourisation* | MnP (U/L)*          | Laccase (U/L)*     | pH*          |
|-------|----------------------|---------------------|--------------------|--------------|
| 1     | 89.39±0.20c          | 508.00±122.00e      | 175.85±10.80f      | 3.35±0.02bcd |
| 2     | 89.48±0.29c          | 1,634.67±268.57de   | 532.59±80.86def    | 3.27±0.09cd  |
| 3     | 93.91±0.96ab         | 4,888.89±763.30bc   | 1,608.40±207.05abc | 3.27±0.12cd  |
| 4     | 94.76±0.99ab         | 6,548.89±1,293.30ab | 1,925.31±85.87ab   | 3.09±0.03d   |
| 5     | 95.81±0.92a          | 6,822.22±697.74ab   | 1,908.03±242.23ab  | 2.57±0.09e   |
| 6     | 95.70±0.23a          | 7,151.11±1,276.80a  | 2,220.99±387.65a   | 2.68±0.11e   |
| 7     | 95.77±0.44a          | 5,591.11±692.76abc  | 1498.77±384.26bcd  | 3.27±0.21cd  |
| 8     | 95.21±0.05ab         | 4,842.44±434.18bc   | 1,218.83±142.11cde | 3.31±0.04bcd |
| 9     | 94.79±0.57ab         | 4,796.67±547.02bc   | 1,198.46±14.44cde  | 3.54±0.20abc |
| 10    | 93.20±1.83ab         | 4,000.00±213.78c    | 935.80±49.39cde    | 3.55±0.07abc |
| 11    | 92.74±1.69b          | 3,840.00±231.79cd   | 875.62±21.95de     | 3.70±0.09a   |
| 12    | 92.61±1.21b          | 3,850±306.68cd      | 844.14±36.60e      | 3.63±0.15ab  |

\* values of mean ± standard deviation from triplicate. Letters a-f indicate statistically significant differences between groups according to one-way ANOVA ( $n = 3$ ,  $p < 0.05$ )

**Table S10.** FTIR spectrum of original textile dyes and decolourised dyes after 12 days of treatment by immobilised *T. hirsuta* PW17-41.

| Spectra  |          | % Transmittance |        |
|----------|----------|-----------------|--------|
| Day 0    | Day 12   | Day 0           | Day 12 |
| 3,366.92 | 3,369.22 | 94.89           | 83.83  |
| 2,955.28 | ND       | 78.85           | ND     |
| 2,921.94 | 2,923.24 | 58.36           | 71.80  |
| ND       | 2,872.30 | ND              | 82.67  |
| 2,852.91 | 2,853.40 | 67.09           | 79.05  |
| 1,707.43 | 1,715.71 | 79.93           | 69.72  |
| 1,643.65 | 1,646.50 | 88.85           | 83.73  |
| 1,619.89 | 1,601.06 | 91.75           | 83.43  |
| 1,593.30 | 1,586.49 | 87.81           | 80.00  |
| 1,526.96 | 1,523.54 | 93.22           | 91.33  |
| 1,494.90 | 1,500.79 | 92.29           | 87.70  |
| 1,461.18 | 1,447.72 | 78.81           | 75.83  |
| 1,403.69 | ND       | 86.31           | ND     |
| 1,376.98 | 1,376.90 | 82.92           | 75.02  |
| 1,351.27 | ND       | 83.76           | ND     |
| 1,293.07 | 1,285.45 | 77.24           | 58.62  |
| 1,241.08 | 1,234.03 | 74.28           | 62.89  |
| 1,184.20 | 1,179.18 | 75.97           | 68.84  |
| 1,135.59 | 1,135.59 | 60.44           | 45.00  |
| 1,088.54 | 1,085.87 | 62.52           | 56.02  |
| 1,034.42 | 1,041.98 | 65.81           | 55.55  |
| 1,008.51 | ND       | 68.50           | ND     |
| 949.68   | ND       | 75.29           | ND     |
| 875.45   | ND       | 82.16           | ND     |
| 836.57   | 840.64   | 79.67           | 68.00  |
| 766.90   | 765.05   | 83.91           | 70.07  |
| 721.62   | 732.07   | 79.64           | 58.43  |
| 686.59   | 688.57   | 81.40           | 60.38  |
| 669.48   | 647.27   | 79.93           | 66.50  |
| 604.68   | 592.26   | 80.36           | 60.80  |
| 569.40   | 567.94   | 75.83           | 53.04  |
| 528.34   | 525.60   | 75.04           | 50.33  |
| 497.40   | ND       | 77.46           | ND     |
| 465.76   | 434.95   | 77.89           | 57.57  |
| 412.11   | ND       | 82.66           | ND     |

ND = not detected



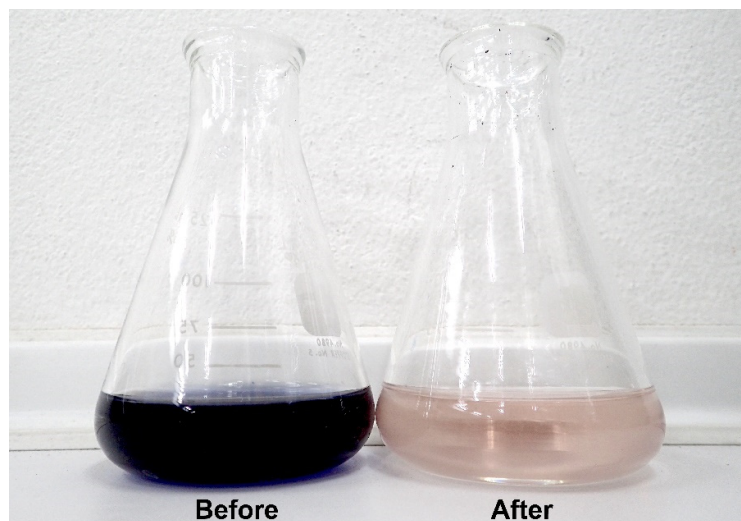

**Figure S1.** Colours of textile dyes before and after the decolourisation process by immobilised *T. hirsuta* PW17-41 under submerged cultivation condition.

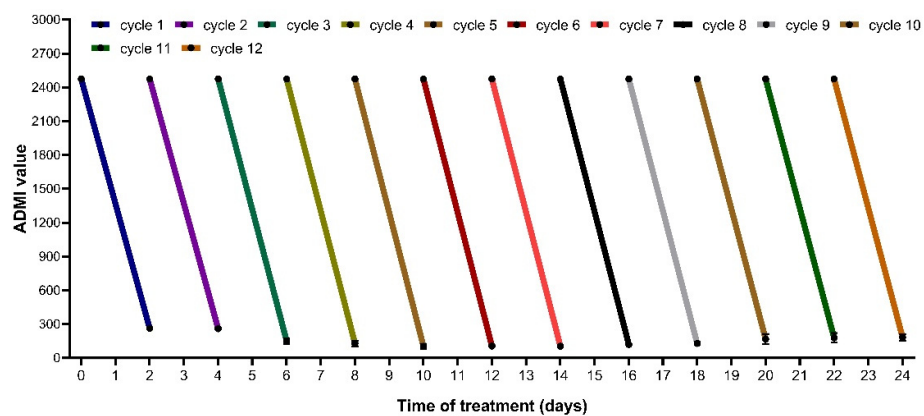

**Figure S2:** Repeated batch experiment of textile dye decolourisation for 12 cycles by immobilised *T. hirsuta* PW17-41 under optimal conditions.
